# Supplementary material for: Deoxynivalenol Impairs Weight Gain and Affects Markers of Gut Health after Low-Dose, Short-Term Exposure of Growing Pigs
Source: PubMed Central journal article supplement (PMC4488690; doi:10.3390/toxins7062071), 2015-06-09
Supplement: toxins-07-02071-s001.pdf [file toxins-07-02071-s001.pdf]

# Supplementary Information

**Table S1.** Feed composition of standard piglet diet.

| <b>Ingredients</b>                                                      | <b>Value (g/kg)</b> | <b>Ingredients</b>                                  | <b>Value (g/kg)</b> |
|-------------------------------------------------------------------------|---------------------|-----------------------------------------------------|---------------------|
| Wheat 2012                                                              | 299.7               | Wheat gluten (Roquette, Lestrem, France)            | 30                  |
| Barley 2012                                                             | 250                 | Beet pulp sugar                                     | 20                  |
| Maize 2012                                                              | 114                 | Fat + 88% triglyceride                              | 8.5                 |
| Soybean (Danex, Izegem, Belgium)                                        | 110                 | Ultracid (INVE, Dendermonde, Belgium)               | 5                   |
| Soya 49/3.5                                                             | 92.7                | Threonine                                           | 0.1                 |
| Premix (Vimix, Deerlijk, Belgium)                                       | 70                  |                                                     |                     |
| <b>Nutrients</b>                                                        | <b>Value</b>        | <b>Nutrients</b>                                    | <b>Value</b>        |
| Crude protein (g)                                                       | 171.30              | 6-phytase (FYT)                                     | 2,100.00            |
| Lysine (g)                                                              | 12.17               | Sodium (g)                                          | 1.47                |
| Digestible lysine (g)                                                   | 10.57               | Chlorine (g)                                        | 3.10                |
| Methionine (g)                                                          | 4.39                | Potassium (g)                                       | 7.83                |
| Digestible methionine (g)                                               | 3.96                | Sodium + potassium-chloride (meq)                   | 192.13              |
| Digestible cystine (g)                                                  | 2.24                | Magnesium (g)                                       | 1.57                |
| Digestible methionine + cystine (g)                                     | 6.26                | Vitamin A per kg (IE)                               | 15,050.00           |
| Digestible threonine (g)                                                | 6.55                | Vitamin D3 per kg (IE)                              | 2,030.00            |
| Digestible tryptophan (g)                                               | 2.00                | Vitamin E per kg (IE)                               | 120.33              |
| Sugar + starch (g)                                                      | 454.83              | Butylated hydroxytoluene (ppm)                      | 150.15              |
| Sugar (g)                                                               | 35.60               | Formic acid (ppm)                                   | 1,633.00            |
| Crude starch (g)                                                        | 401.50              | Lactic acid (ppm)                                   | 2,105.00            |
| Crude fiber (g)                                                         | 35.96               | Moisture (g)                                        | 115.86              |
| Net energy (kCal)                                                       | 2,347.17            | Weight (%)                                          | 100.00              |
| Crude fat (g)                                                           | 47.98               | Cu premix copper sulfate (ppm)                      | 148.03              |
| Linoleic acid (g)                                                       | 18.98               | Fe premix sulfate (ppm)                             | 198.17              |
| n-3 poly unsaturated fatty acid (g)                                     | 2.26                | Mn premix (oxide) (ppm)                             | 52.22               |
| n-6 poly unsaturated fatty acid (g)                                     | 18.70               | Zn premix (sulfate) (ppm)                           | 101.85              |
| Crude ash (g)                                                           | 49.81               | I premix (calcium iodate) (ppm)                     | 1.12                |
| Ca (g)                                                                  | 7.09                | Co carbonate (ppm)                                  | 1.12                |
| Phosphorus (g)                                                          | 5.12                | Se sodium selenite (ppm)                            | 0.29                |
| Digestible phosphorus pellet (g)                                        | 3.50                | Bacterial endo-xylanase (IU)                        | 11.06               |
| Digestible phosphorus flour (g)                                         | 3.78                |                                                     |                     |
| <b>Nutrient ratio</b>                                                   | <b>Value</b>        | <b>Nutrient ratio</b>                               | <b>Value</b>        |
| Calcium (g)/Phosphorus (g)                                              | 1.38                | Digestible methionine (g)/<br>Digestible lysine (g) | 0.37                |
| Calcium (g)/Digestible phosphorus flour (g)                             | 1.87                | Digestible threonine (g)/<br>Digestible lysine (g)  | 0.62                |
| n-6 poly unsaturated fatty acid (g)/<br>n-3 poly unsaturated fatty acid | 8.28                | Digestible tryptophan (g)/<br>Digestible lysine (g) | 0.19                |
| Digestible methionine+cystine (g)/<br>Digestible lysine (g)             | 0.59                |                                                     |                     |

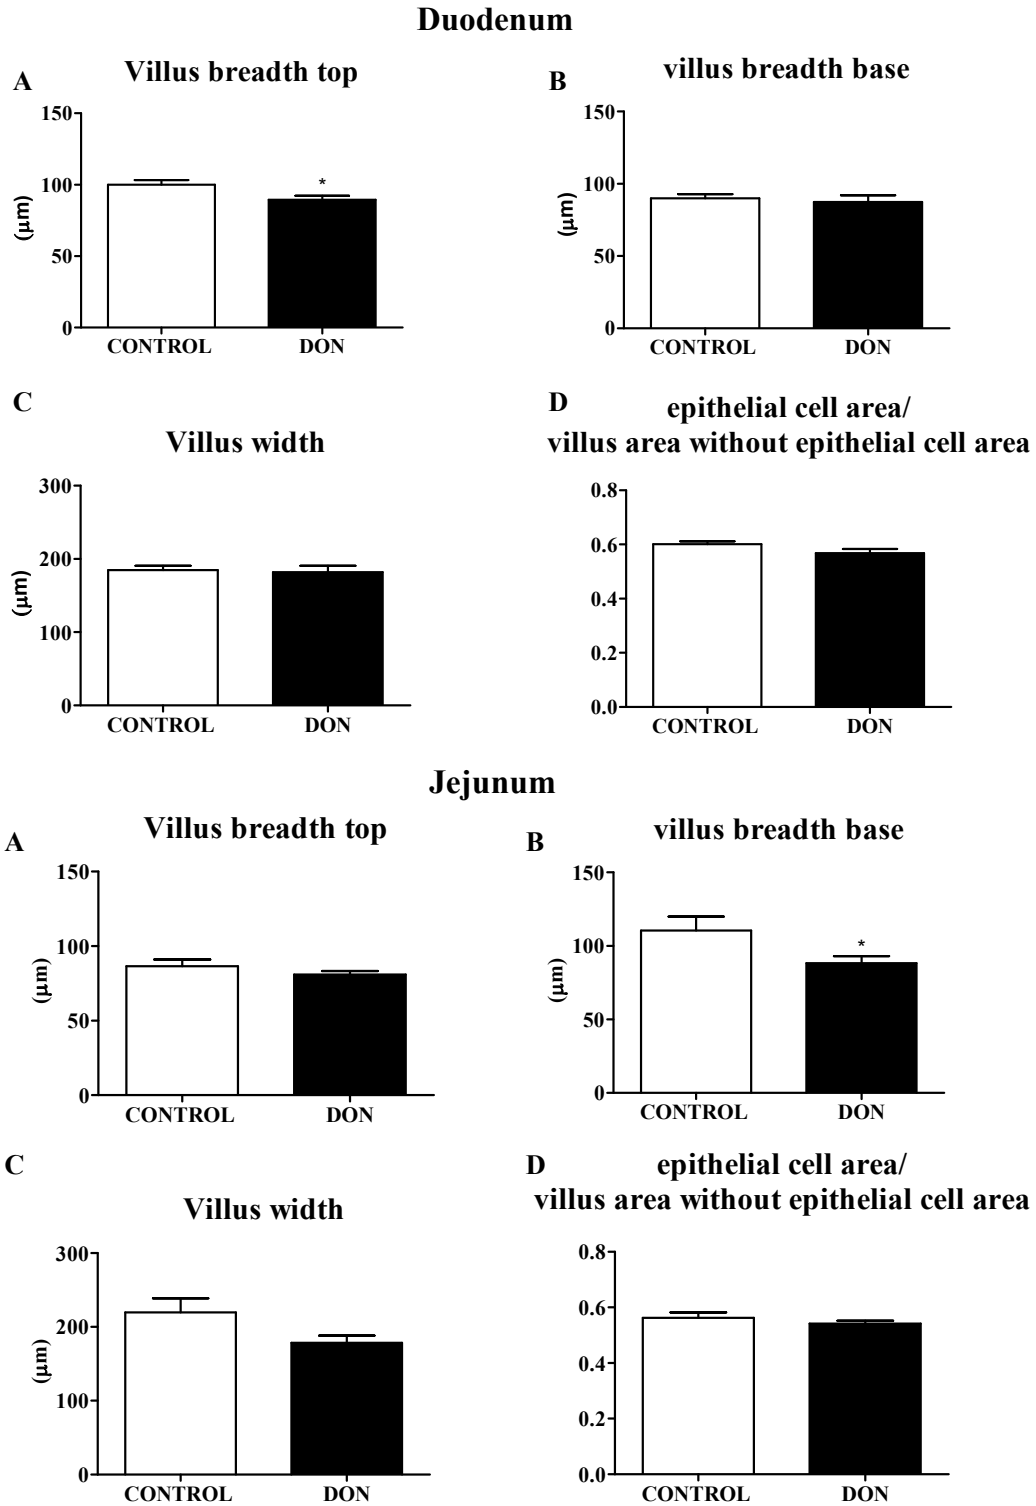

**Figure S1.** Histomorphological measurements in the piglet duodenum and jejunum.  
 \*  $p \leq 0.05$ ; significantly different from the control group.
